# Supplementary material for: One-Pot Synthesis of 3-Functionalized 4-Hydroxycoumarin under Catalyst-Free Conditions
Source: Molecules. 2018 Jan 22;23(1):235. doi: 10.3390/molecules23010235 (PMC6017609; doi:10.3390/molecules23010235)

## (Supplementary Materials)

### One-Pot Syntesis of 3-Functionalized 4-Hydroxy- coumarin under Catalyst-Free Conditions

Yang Gao <sup>1</sup>, Guoning Zhang<sup>2</sup>, Juxian Wang<sup>2</sup>, Xiaoguang Bai<sup>2</sup>, Yiliang Li<sup>3,\*</sup> and  
Yucheng Wang <sup>2,\*</sup>

<sup>1</sup>H NMR of compound **4a**

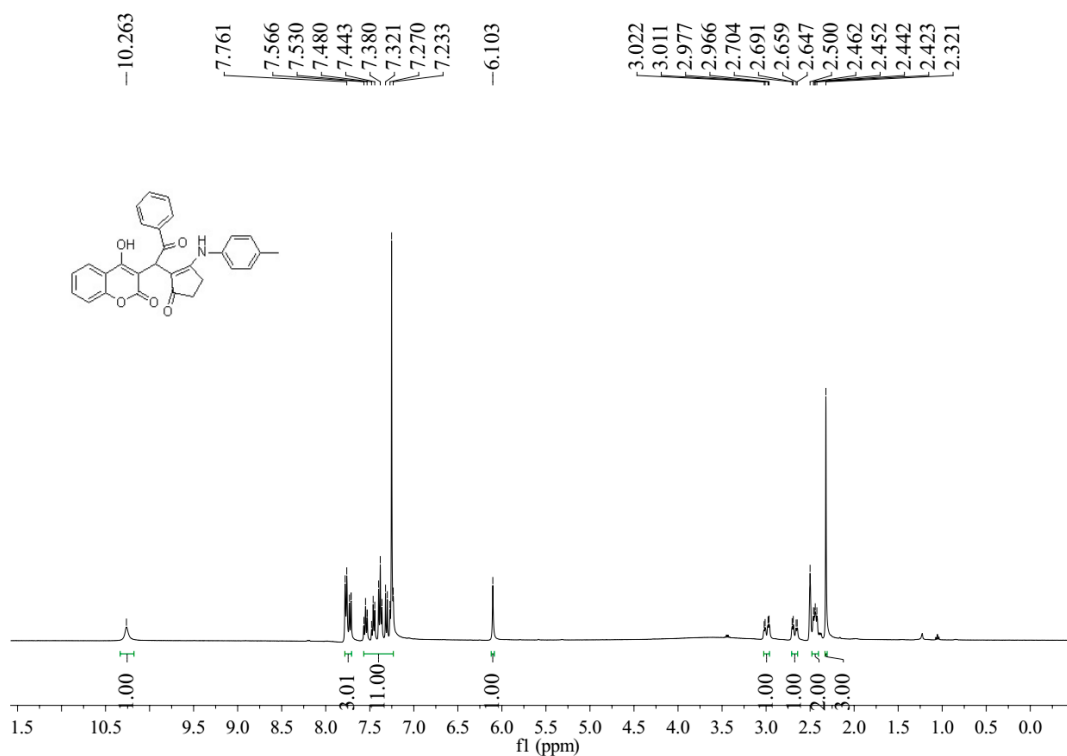

<sup>13</sup>C NMR of compound **4a**

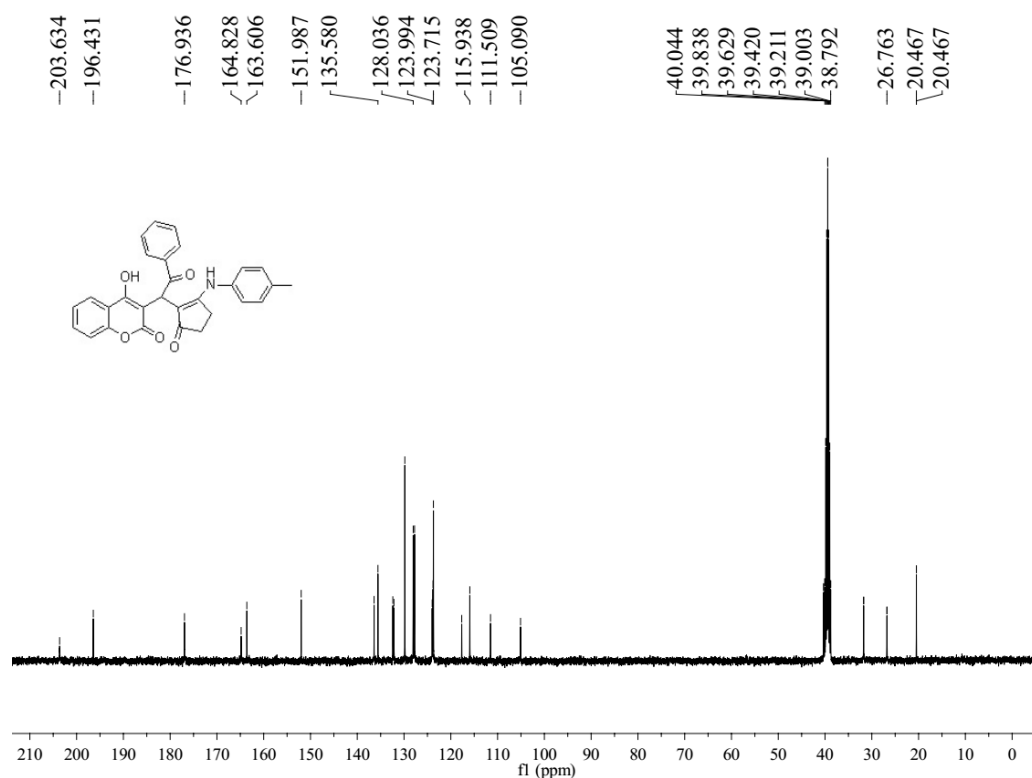

<sup>1</sup>H NMR of compound **4b**

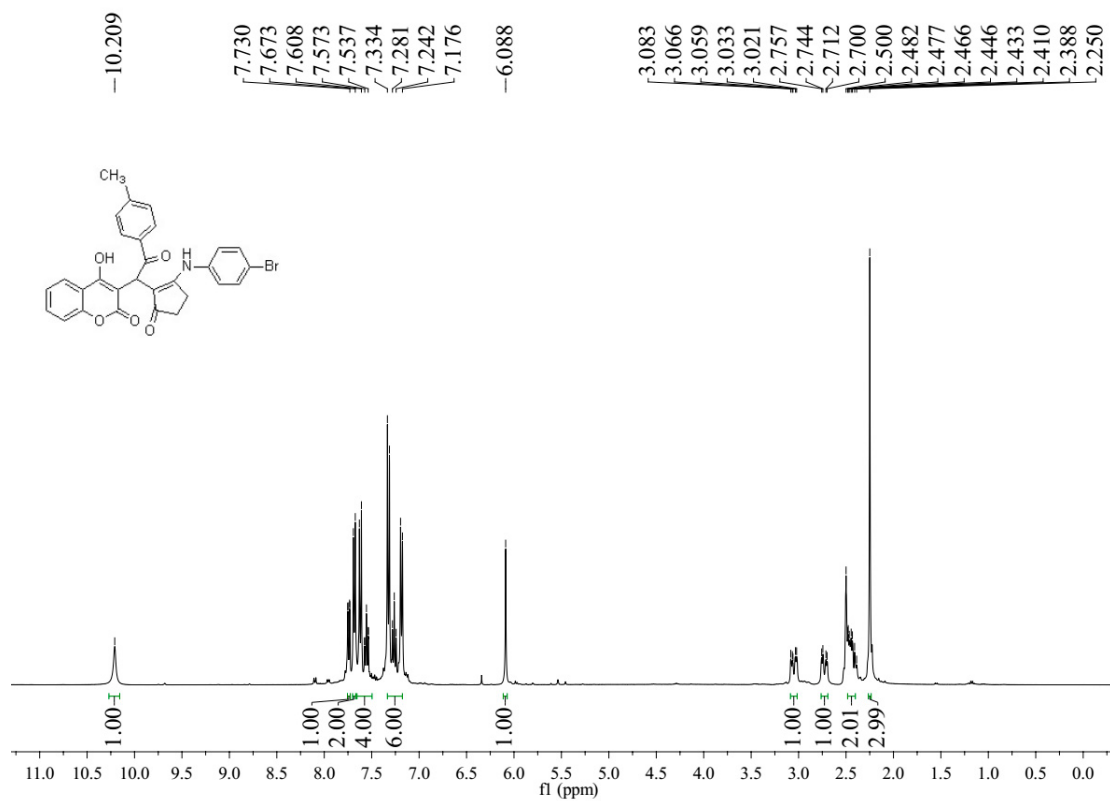

<sup>13</sup>C NMR of compound **4b**

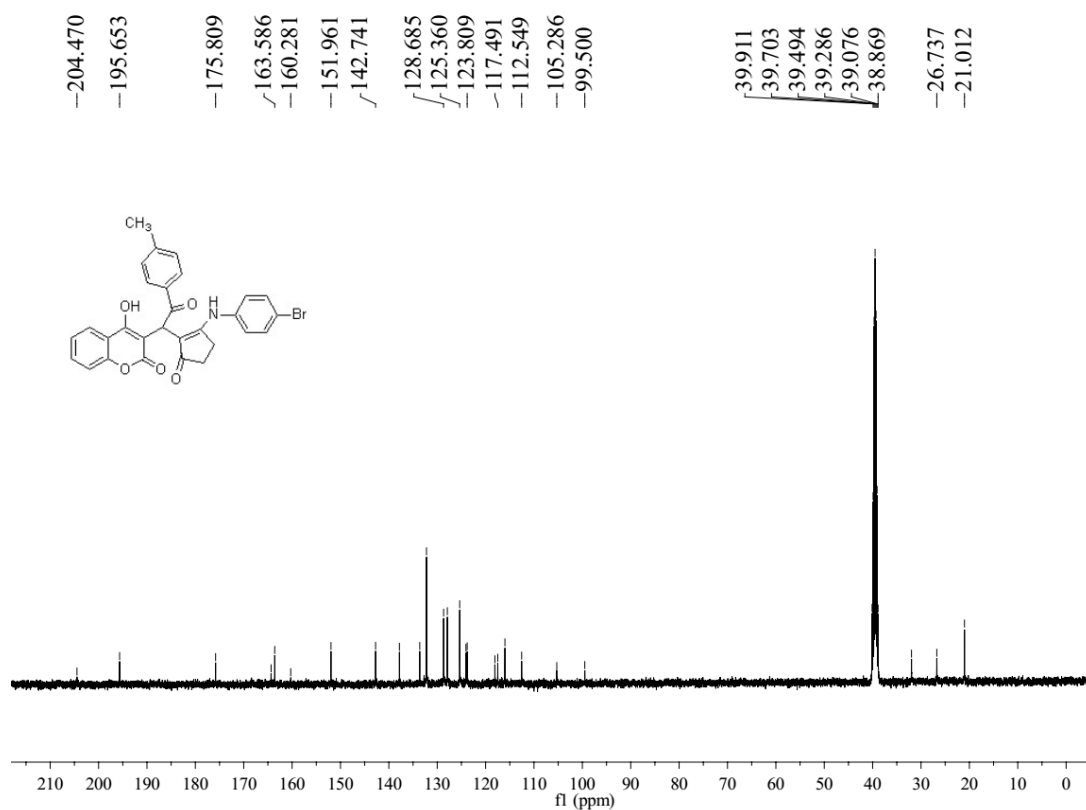

<sup>1</sup>H NMR of compound **4c**

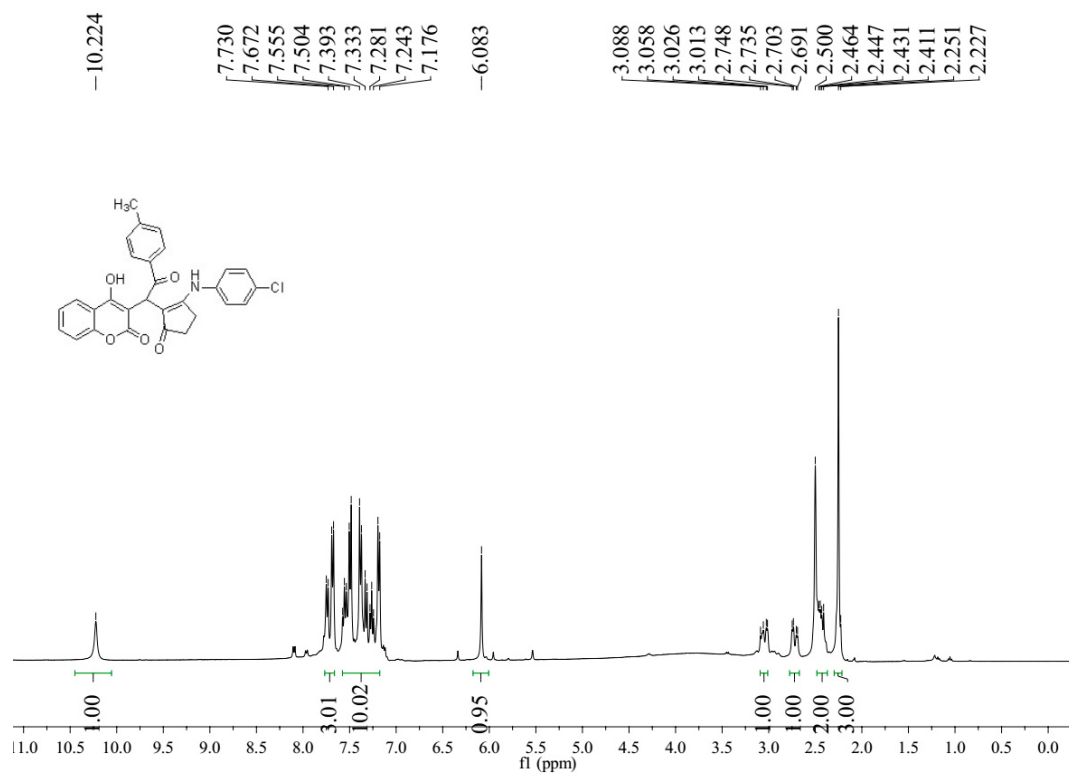

$^{13}\text{C}$  NMR of compound **4c**

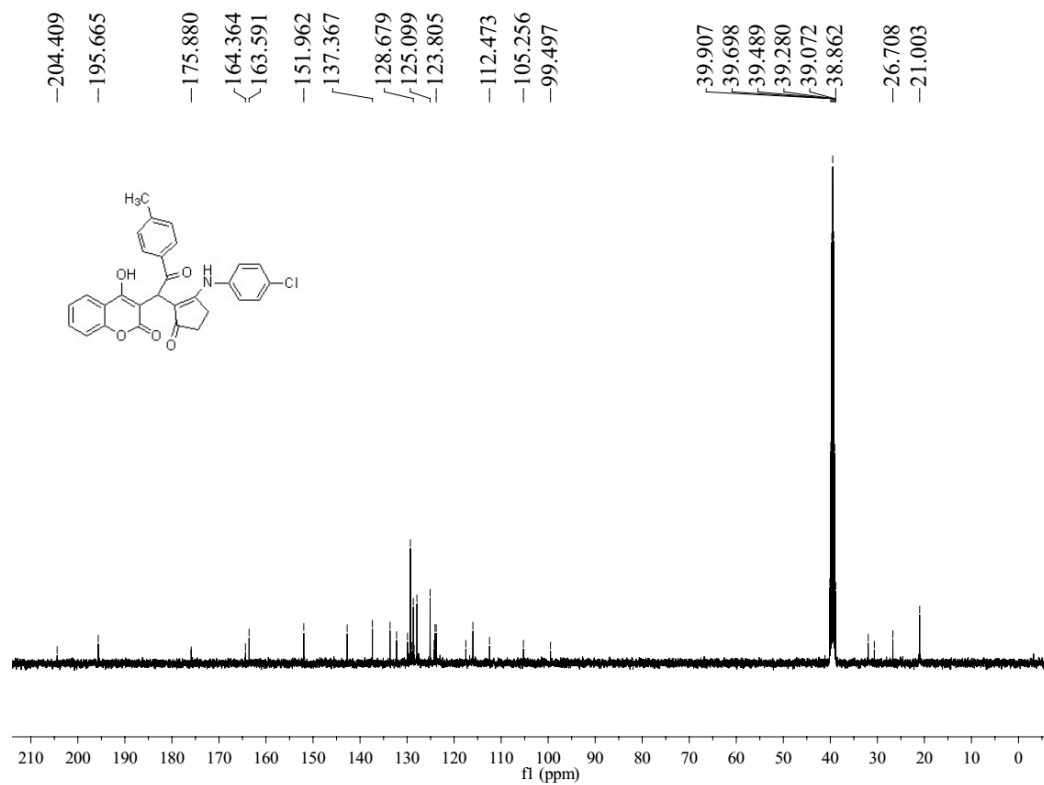

$^1\text{H}$  NMR of compound **4d**

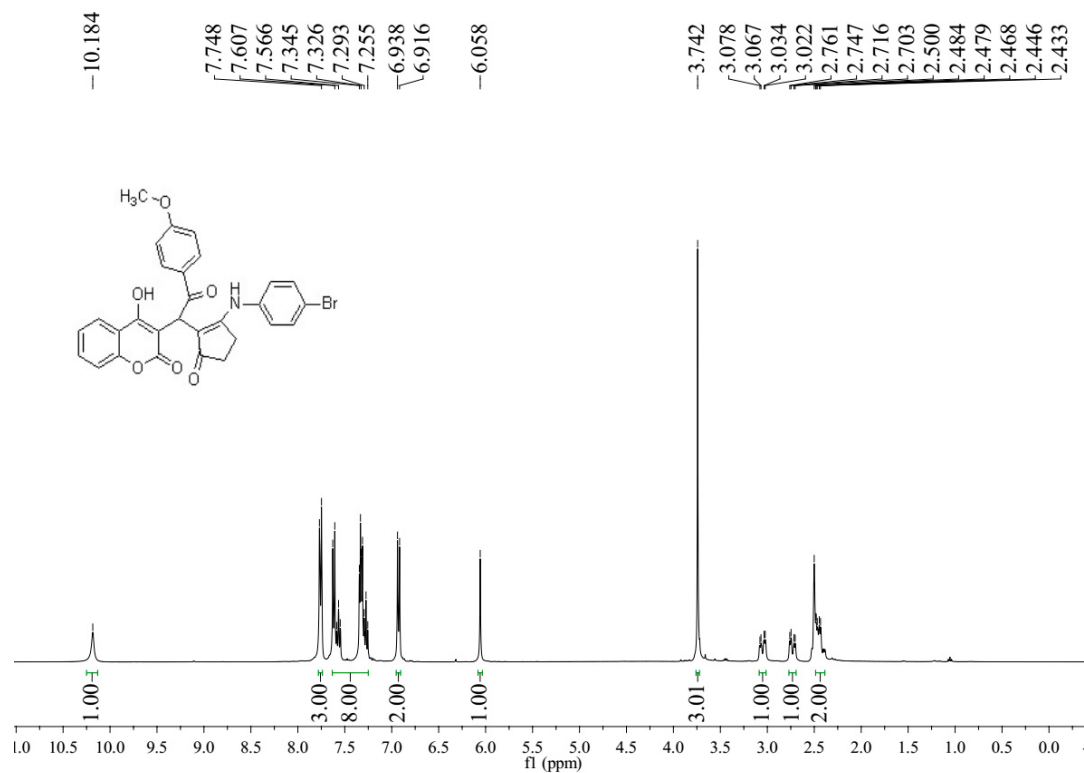

<sup>13</sup>C NMR of compound **4d**

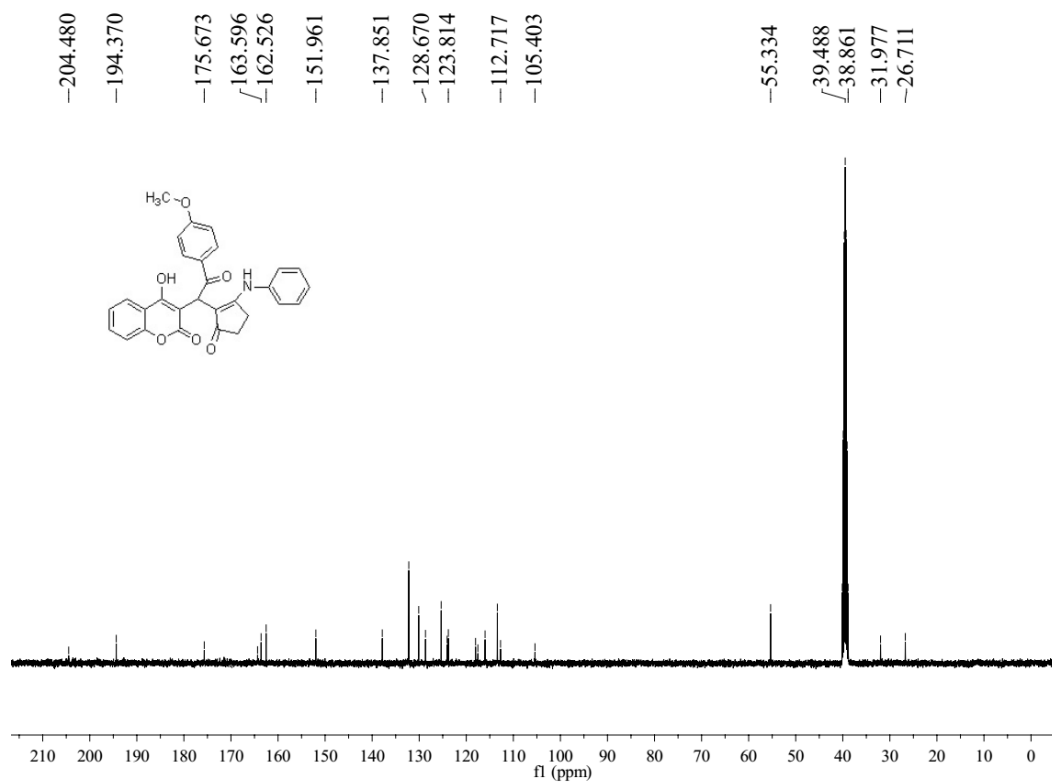

<sup>1</sup>H NMR of compound **4e**

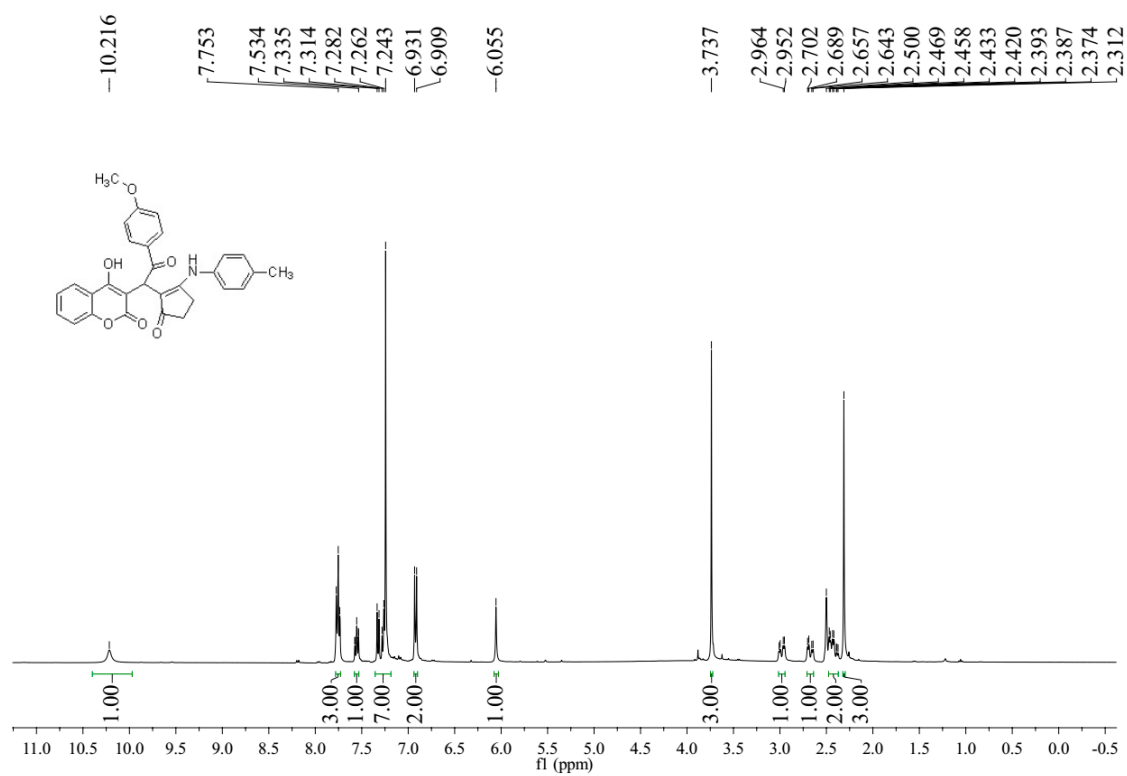

<sup>13</sup>C NMR of compound **4e**

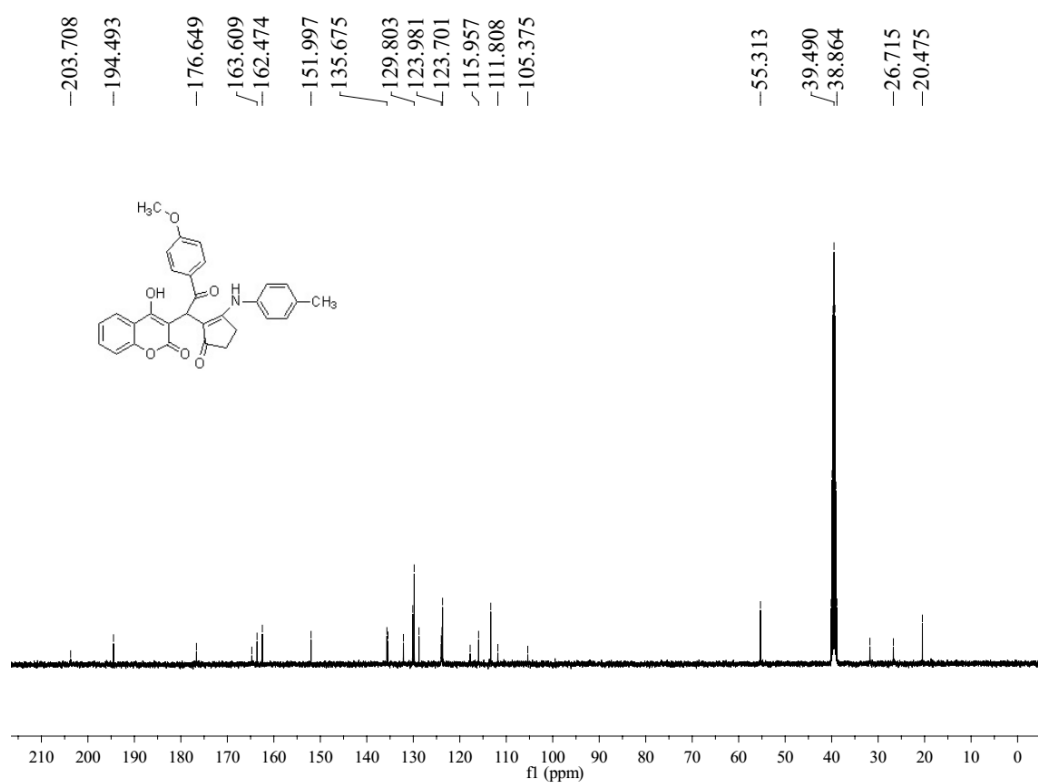

<sup>1</sup>H NMR of compound **4f**

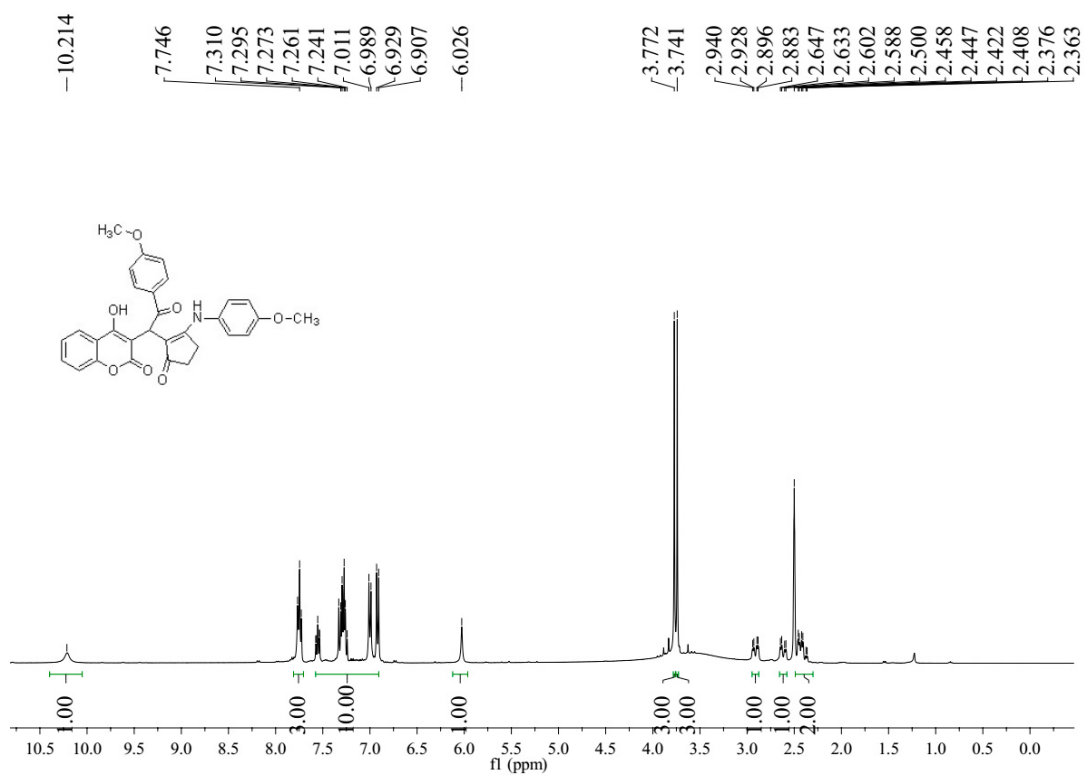

<sup>13</sup>C NMR of compound **4f**

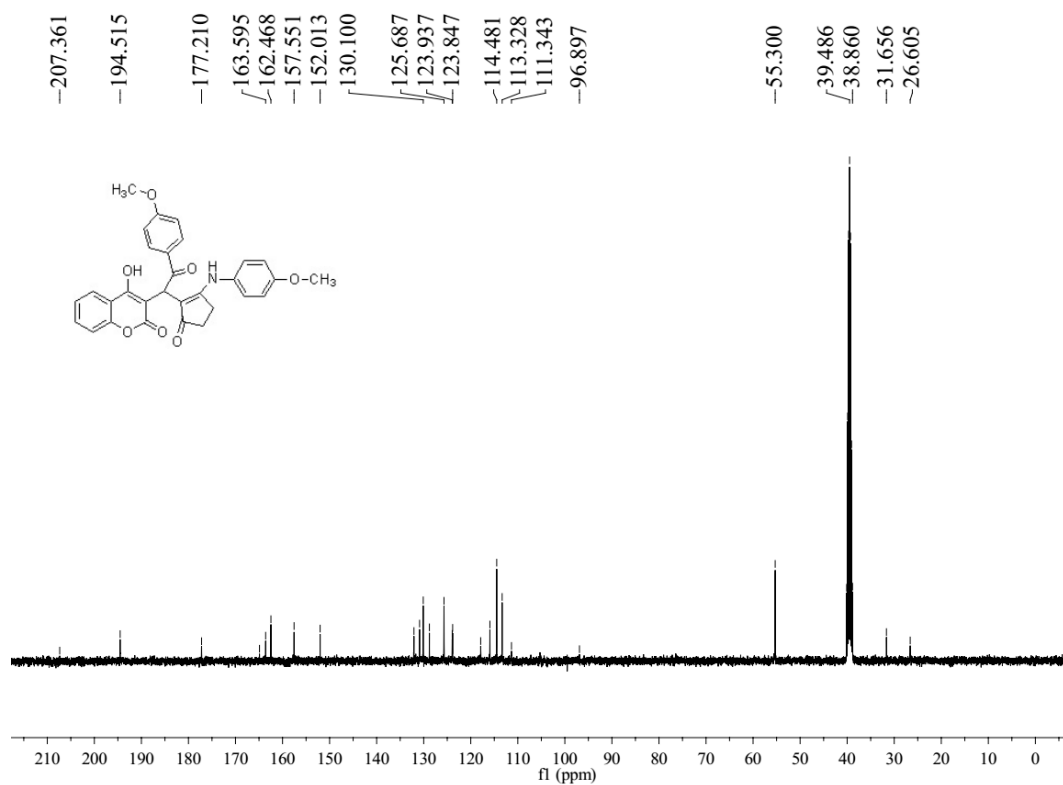

<sup>1</sup>H NMR of compound **4g**

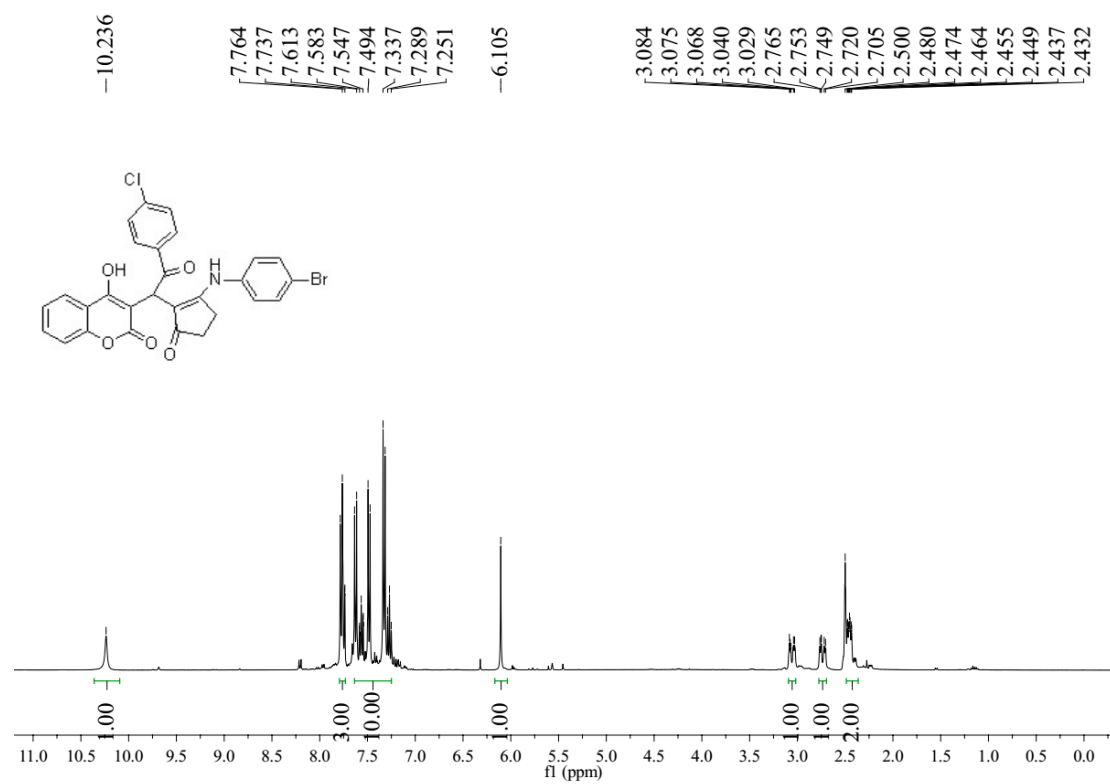

<sup>13</sup>C NMR of compound **4g**

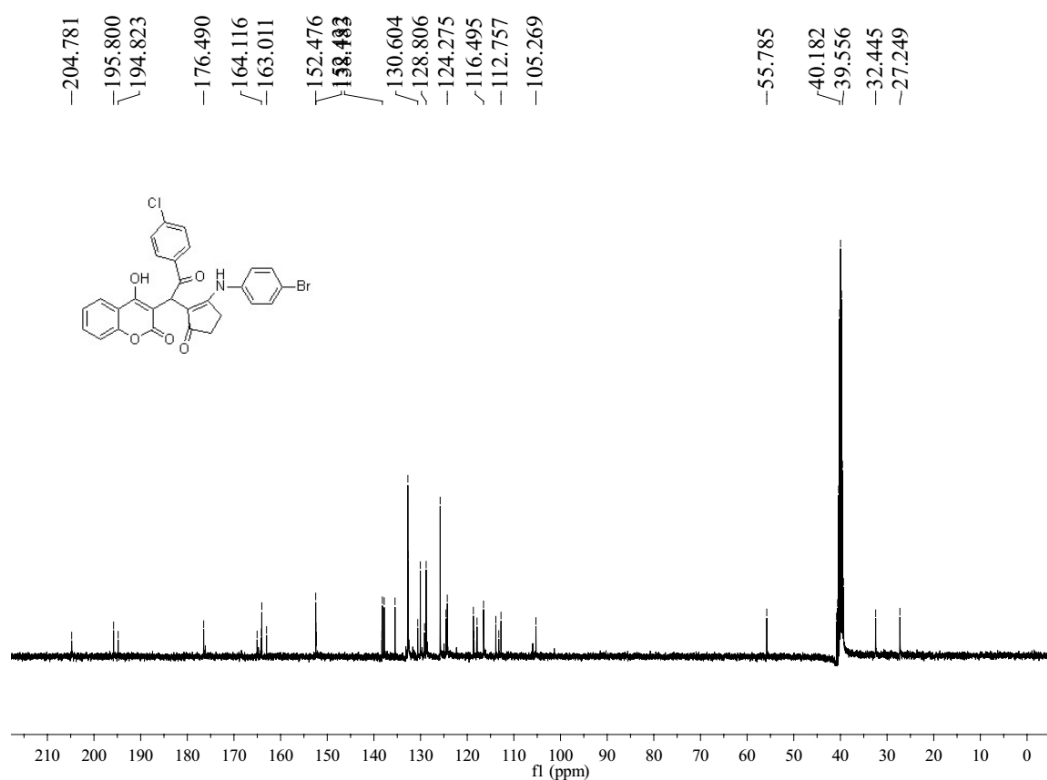

<sup>1</sup>H NMR of compound **4h**

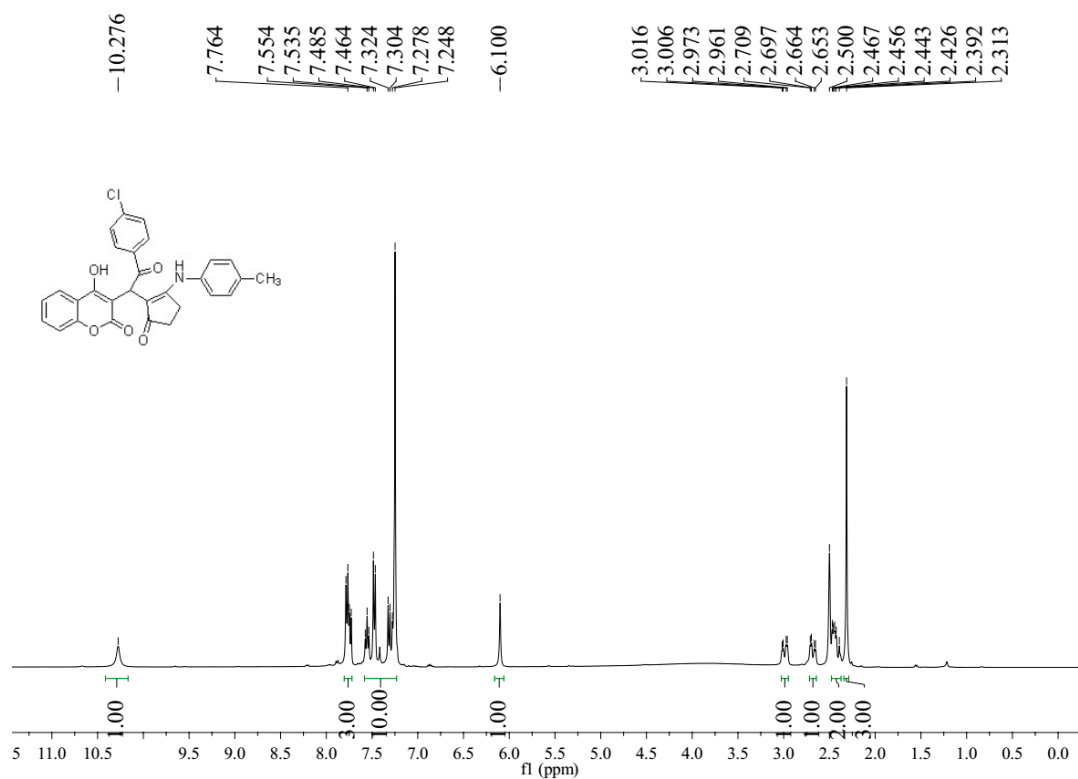

<sup>13</sup>C NMR of compound **4h**

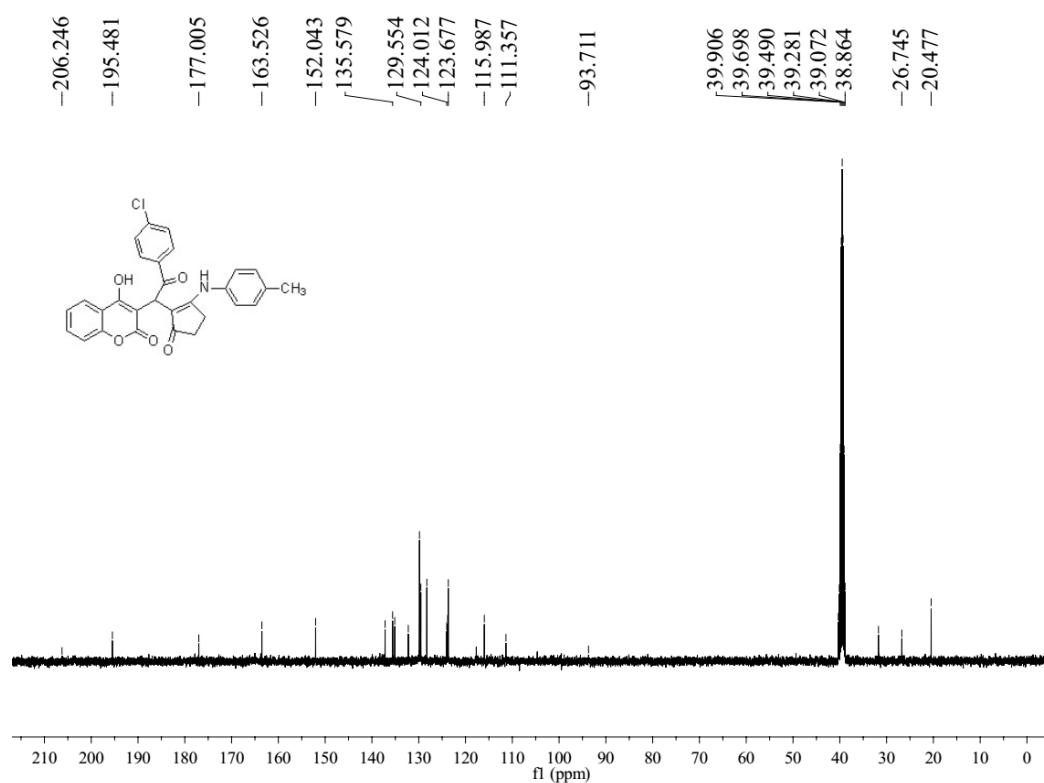

<sup>1</sup>H NMR of compound **4i**

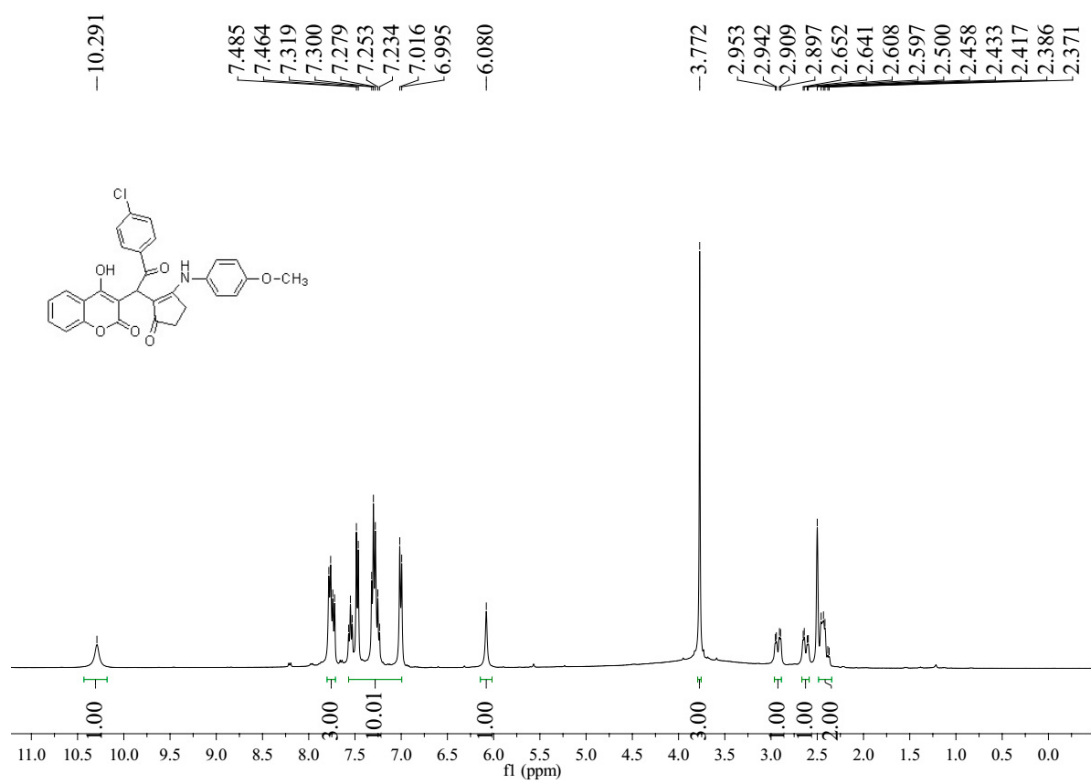

$^{13}\text{C}$  NMR of compound **4i**

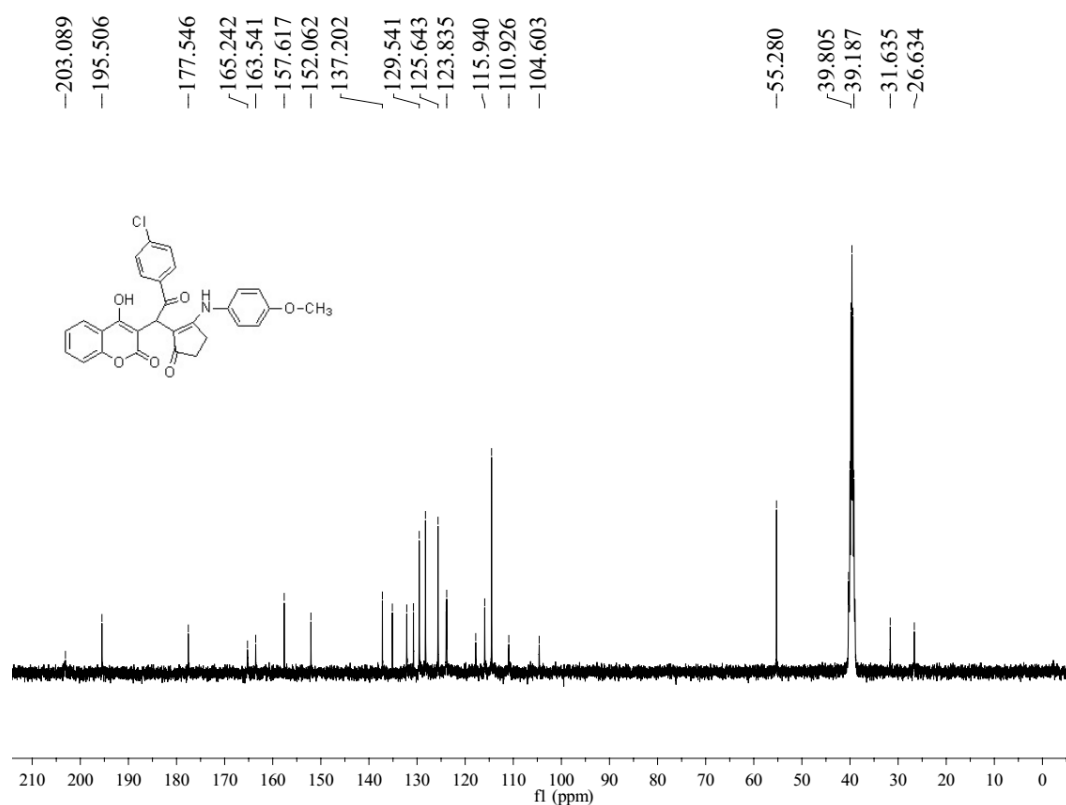

$^1\text{H}$  NMR of compound **4j**

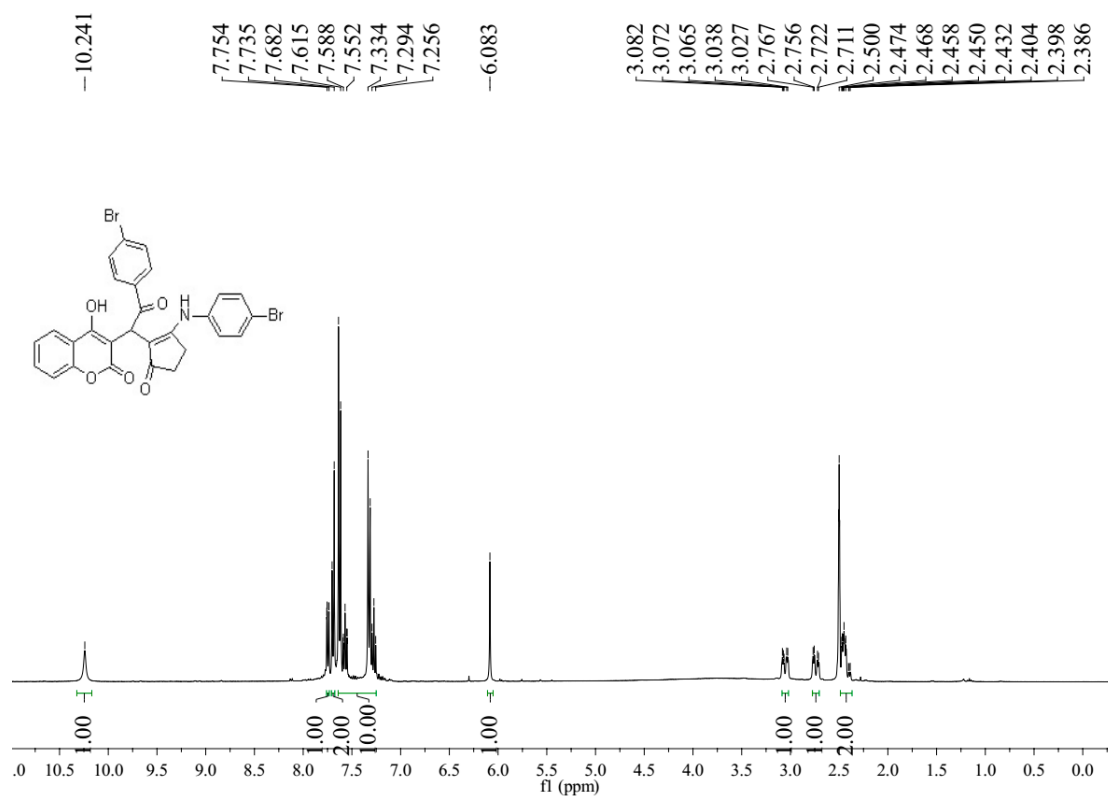

<sup>13</sup>C NMR of compound **4j**

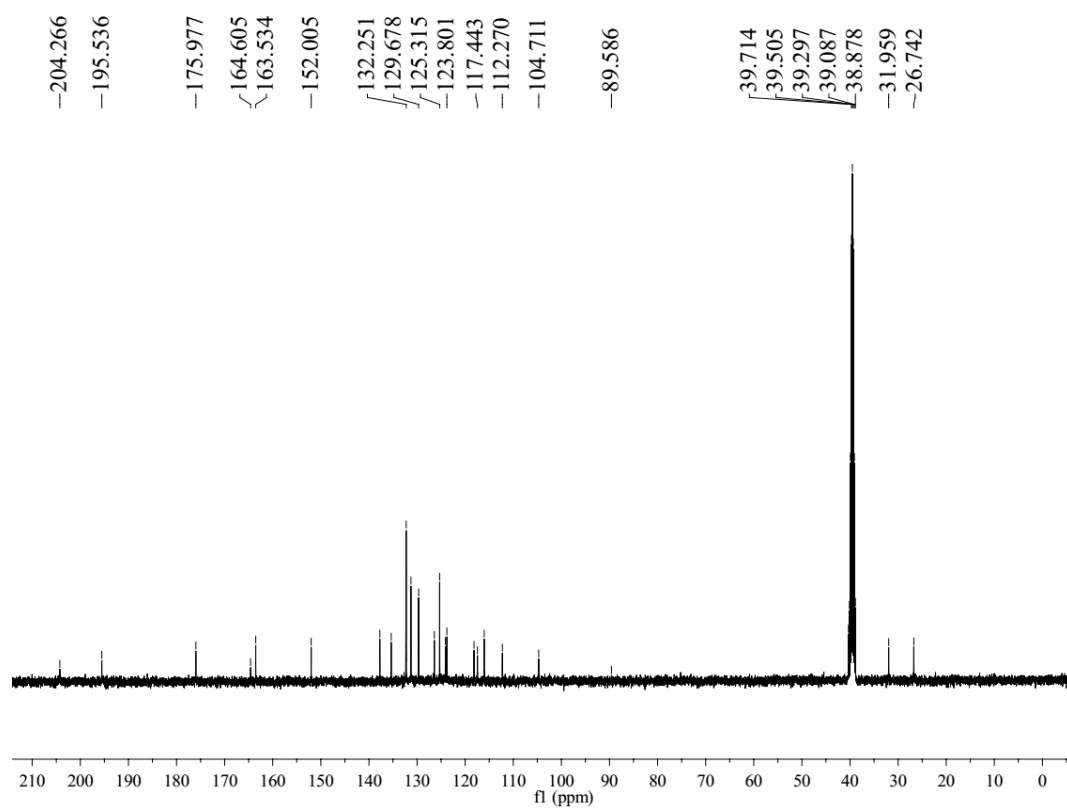

<sup>1</sup>H NMR of compound **4k**

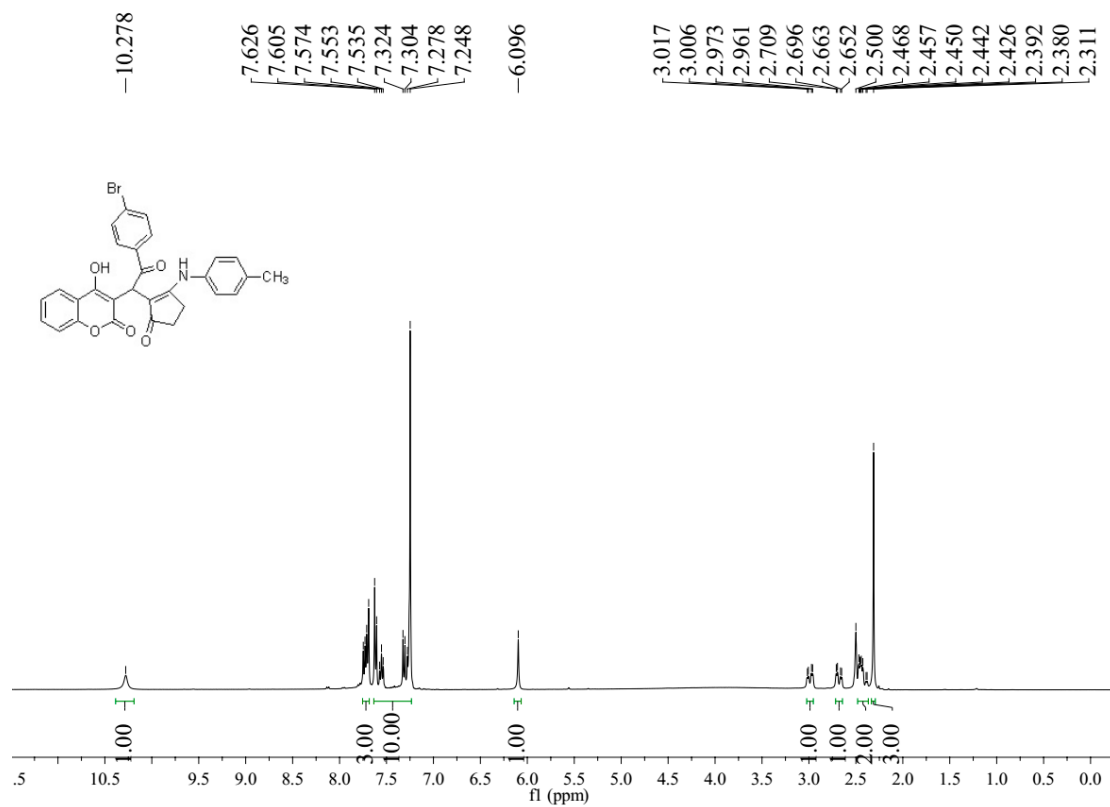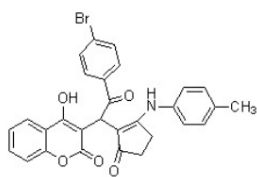

$^{13}\text{C}$  NMR of compound **4k**

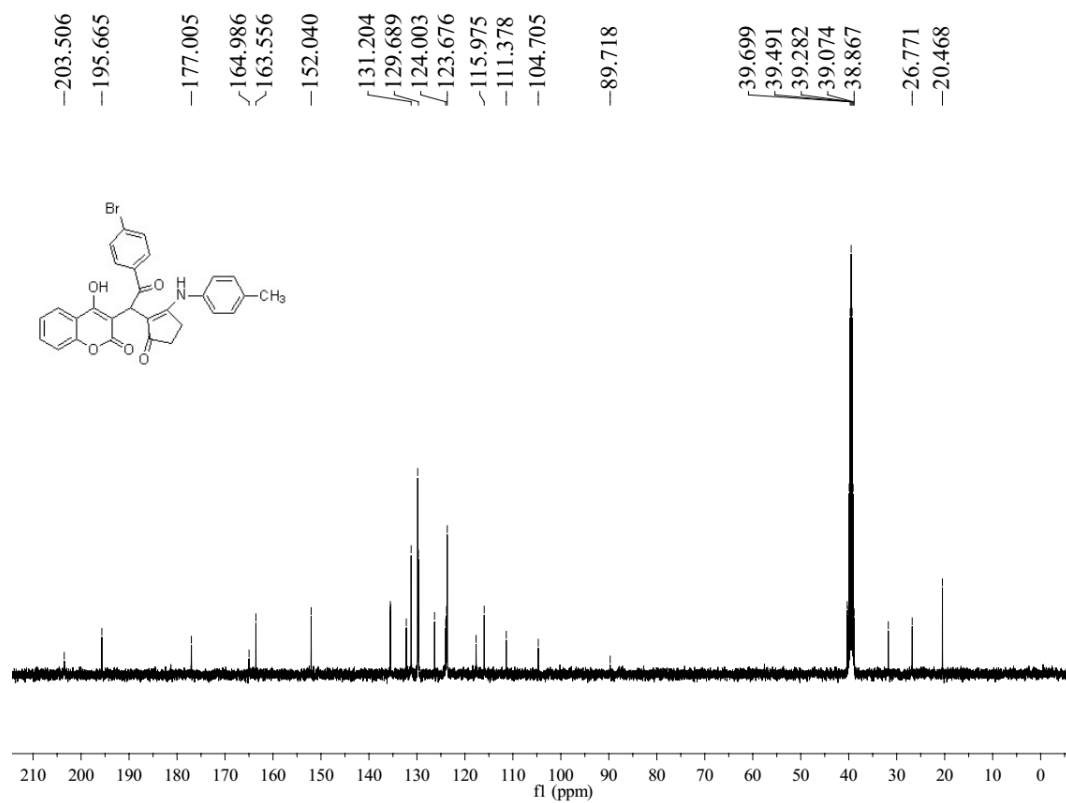

$^1\text{H}$  NMR of compound **6a**

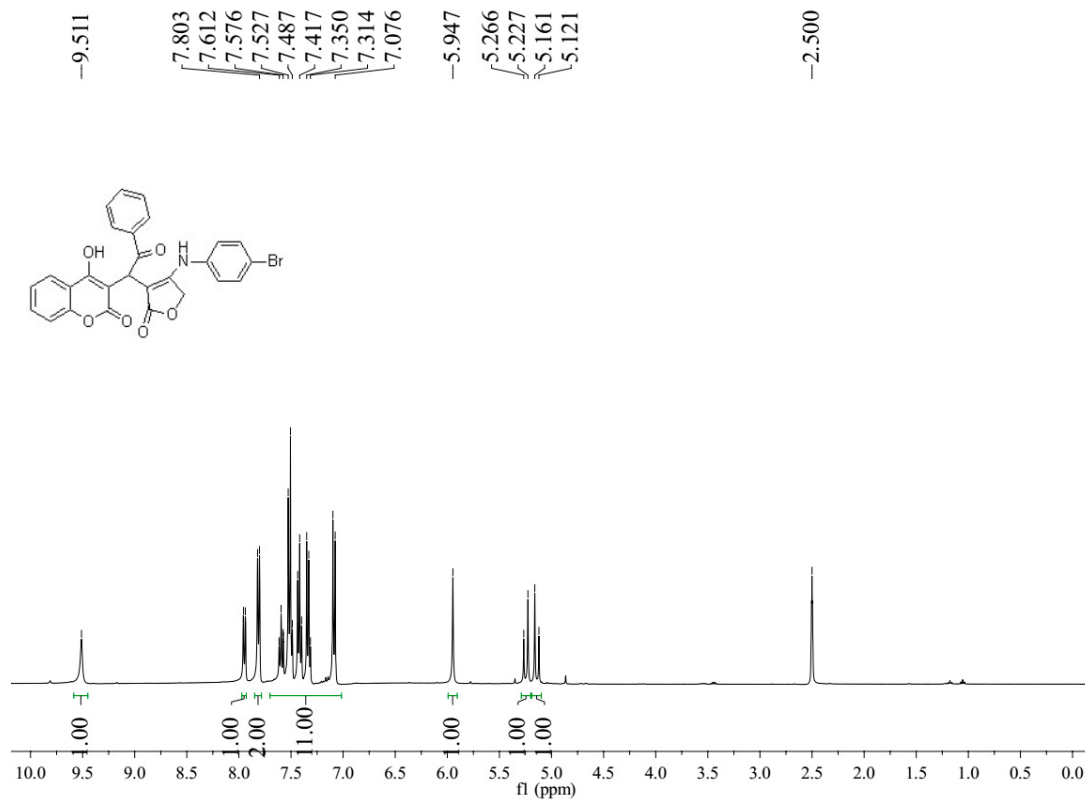

<sup>13</sup>C NMR of compound **6a**

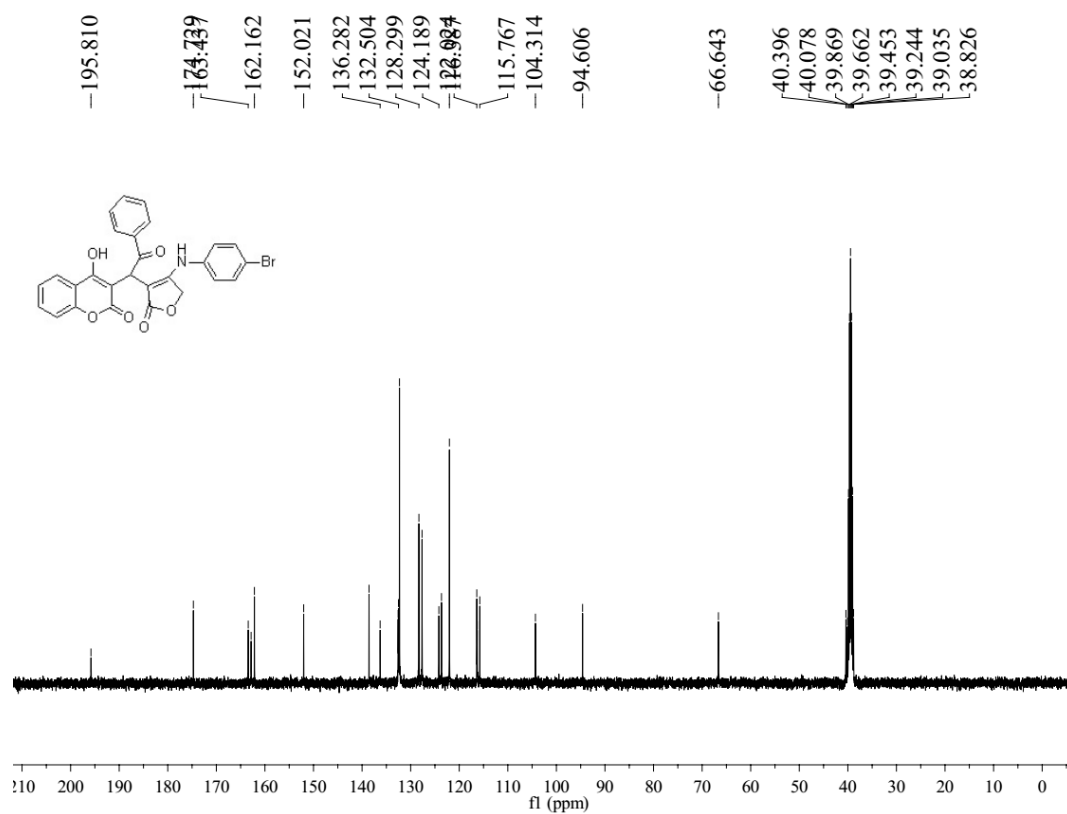

<sup>1</sup>H NMR of compound **6b**

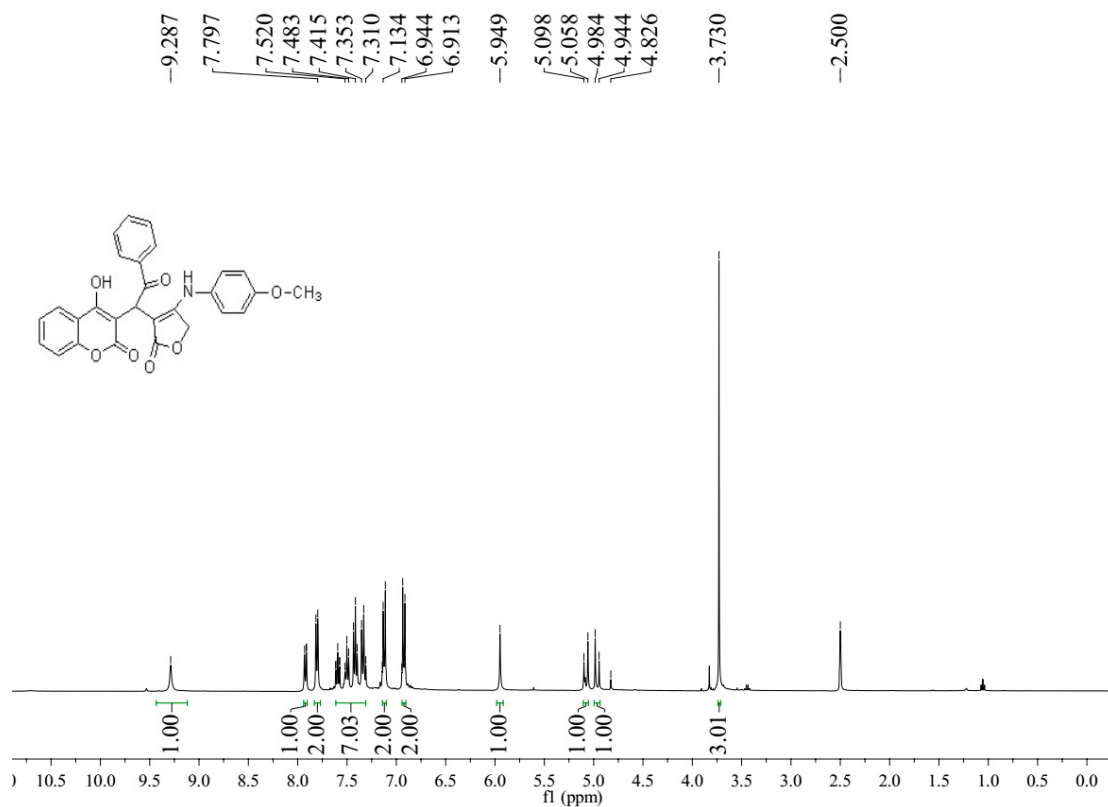

<sup>13</sup>C NMR of compound **6b**

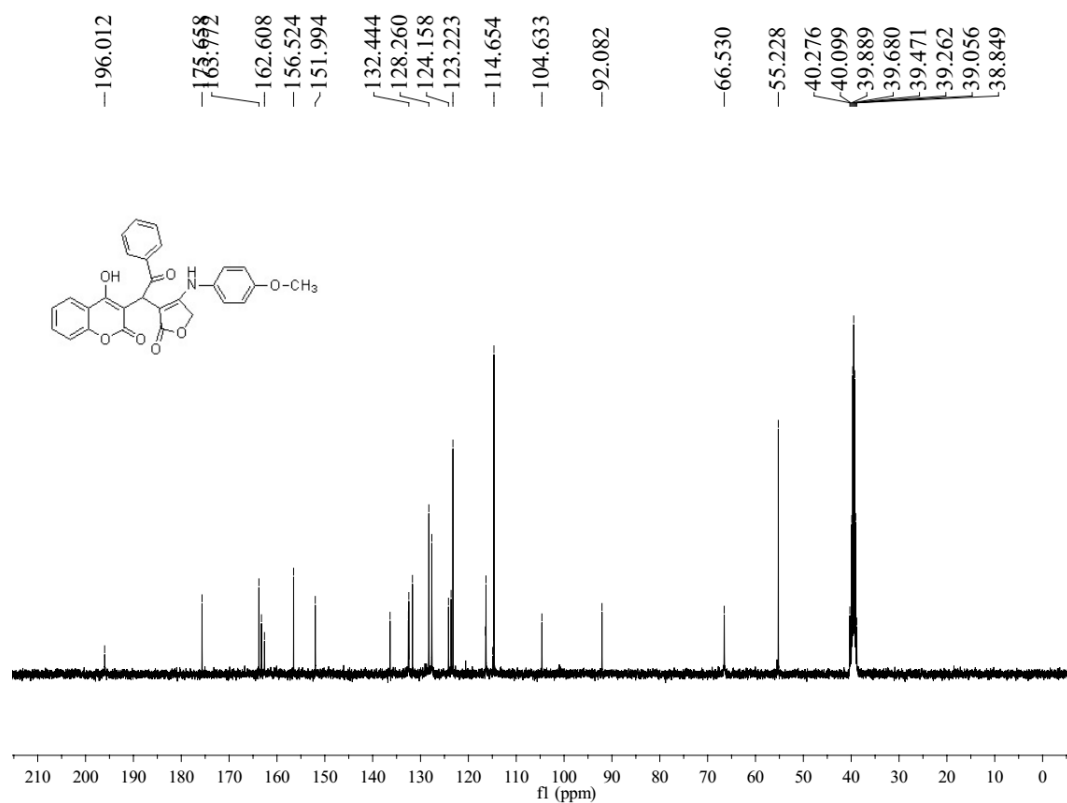

<sup>1</sup>H NMR of compound **6c**

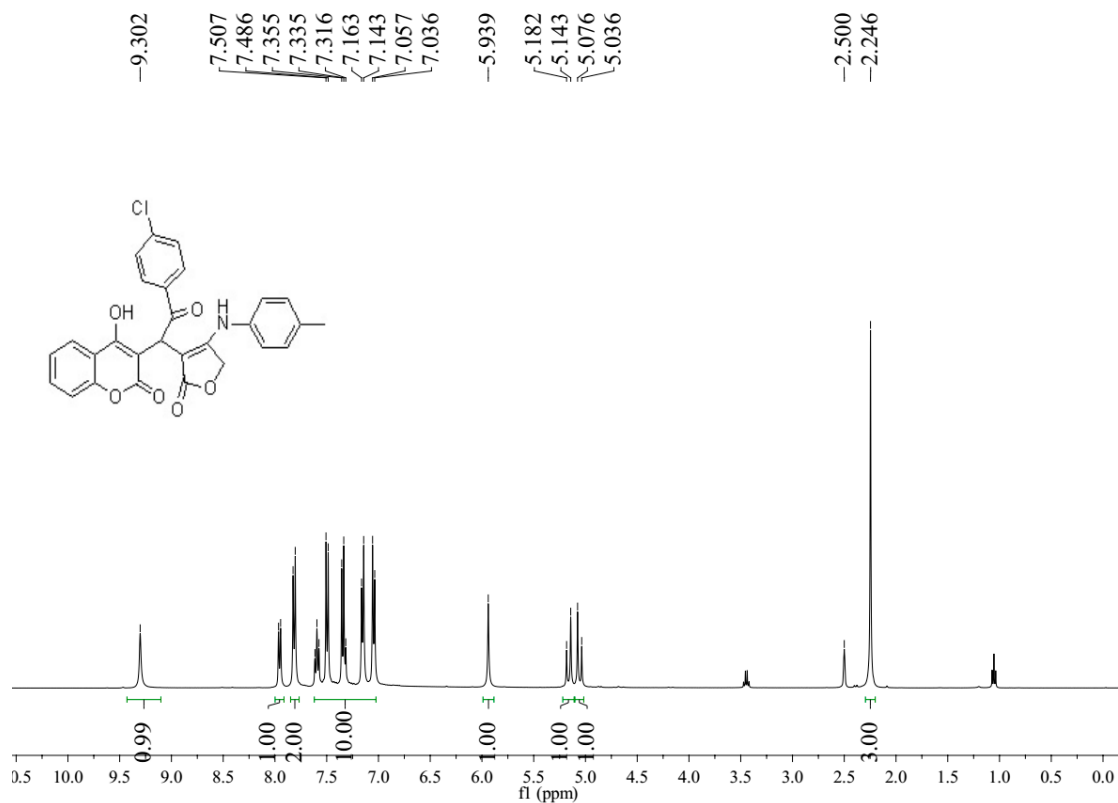

$^{13}\text{C}$  NMR of compound **6c**

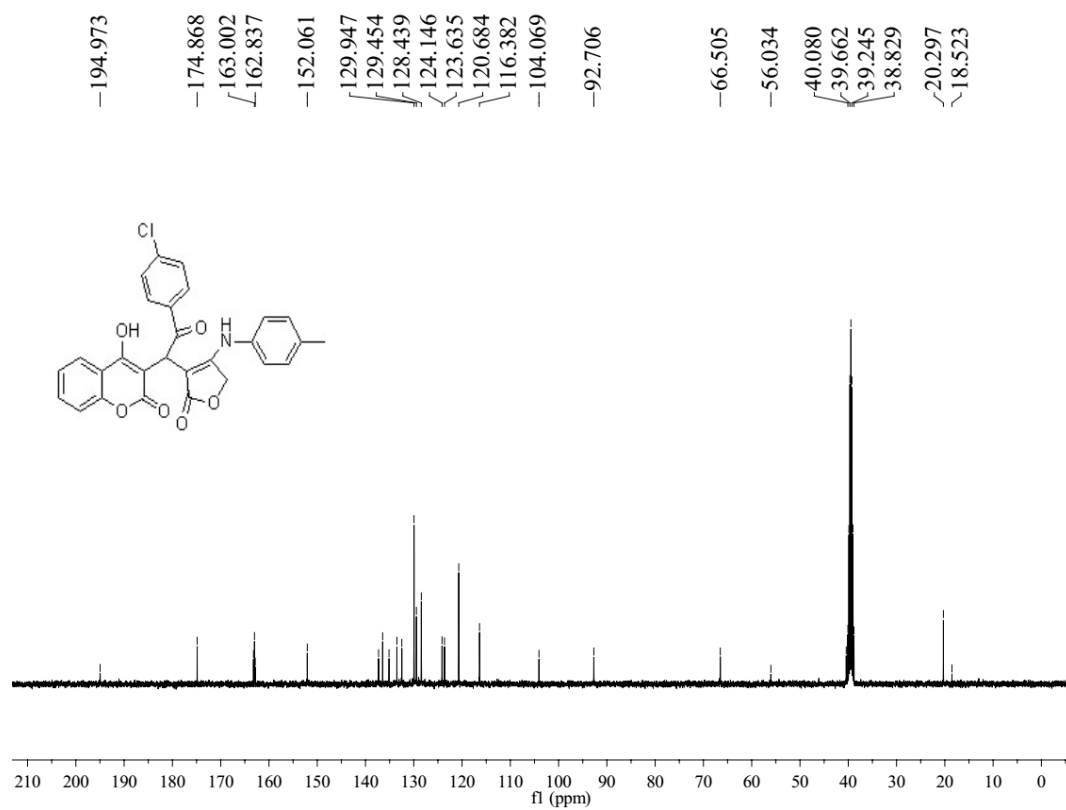

$^1\text{H}$  NMR of compound **6d**

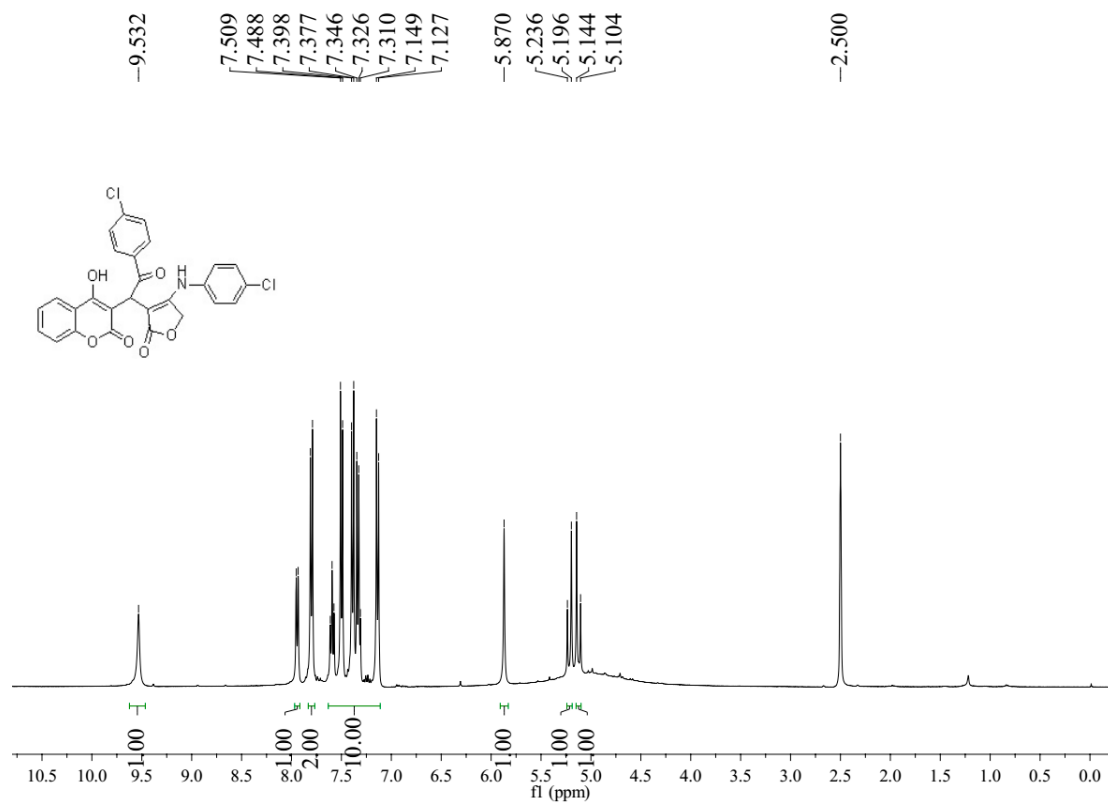

$^{13}\text{C}$  NMR of compound **6d**

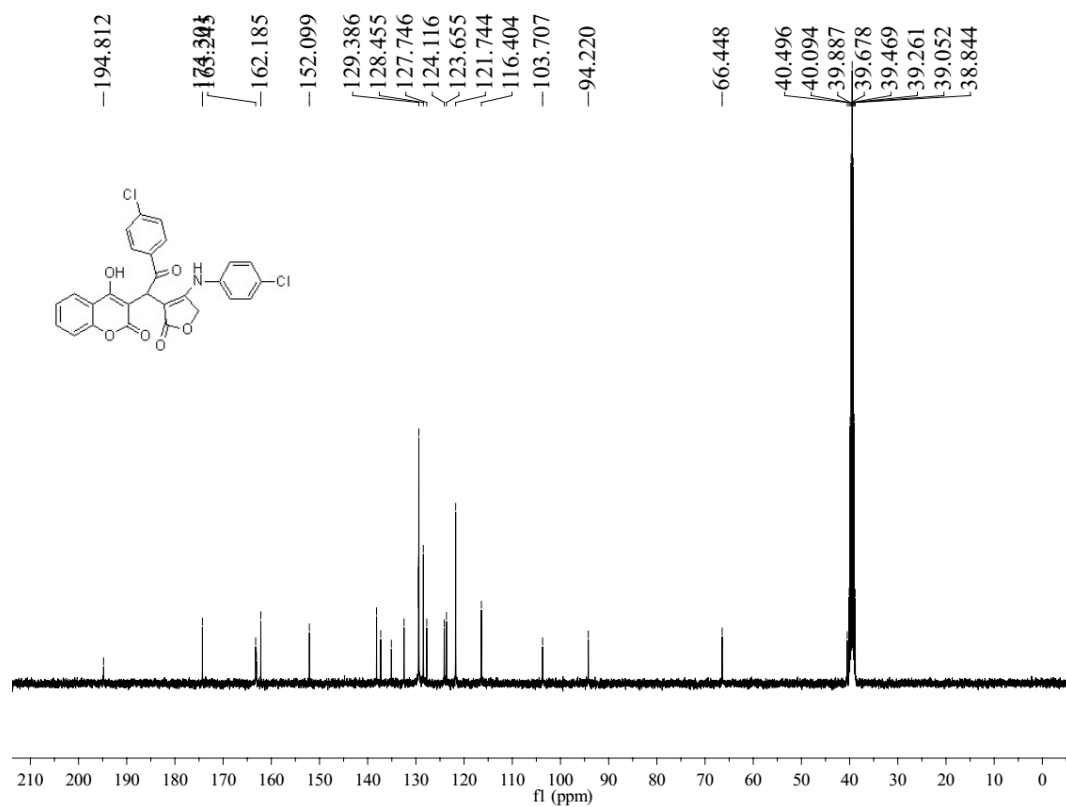

$^1\text{H}$  NMR of compound **6e**

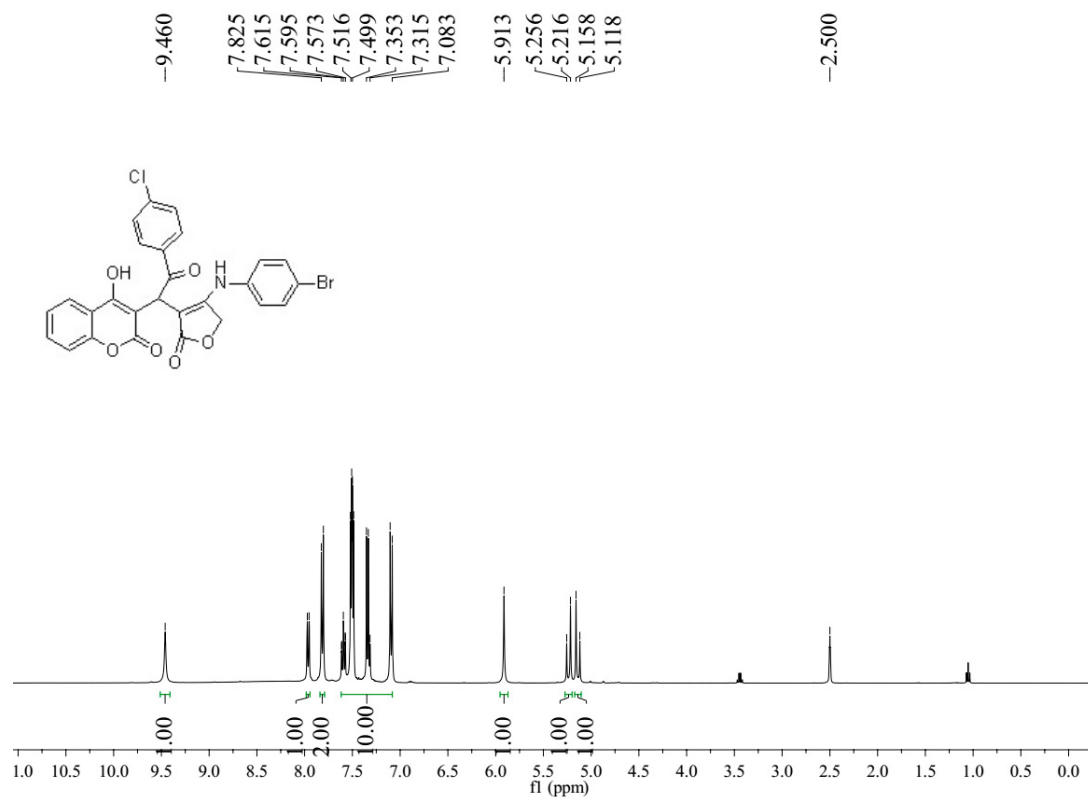

$^{13}\text{C}$  NMR of compound **6e**

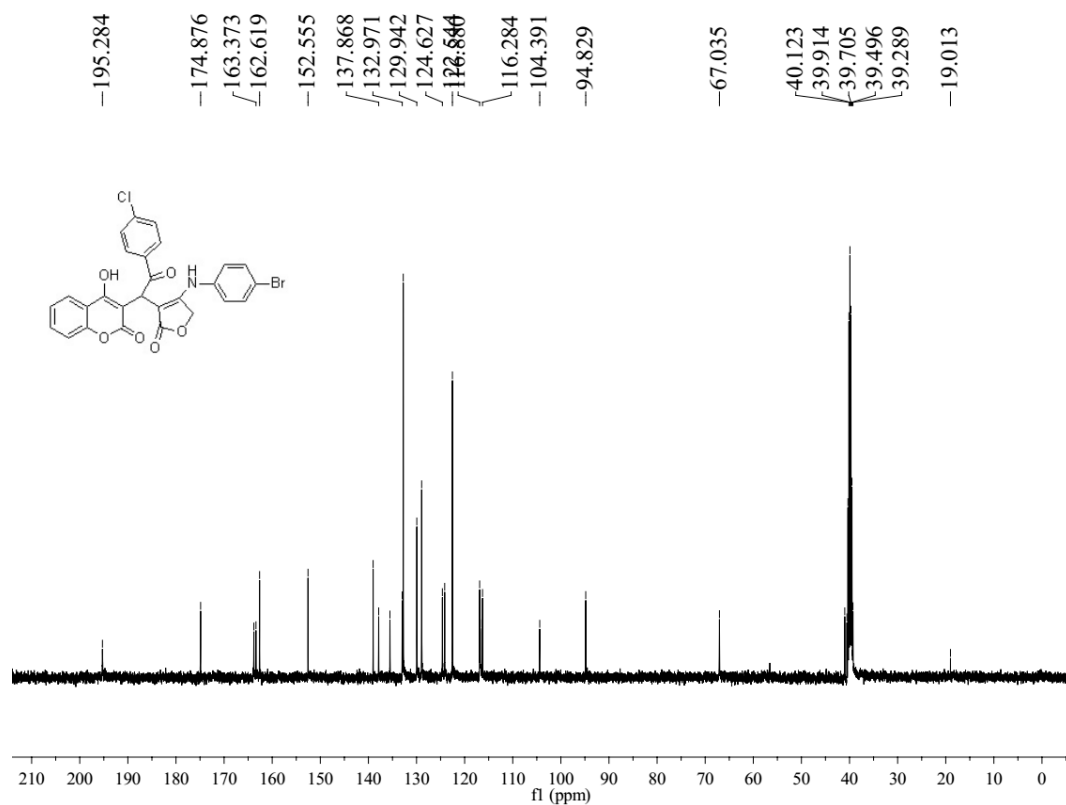

$^1\text{H}$  NMR of compound **6f**

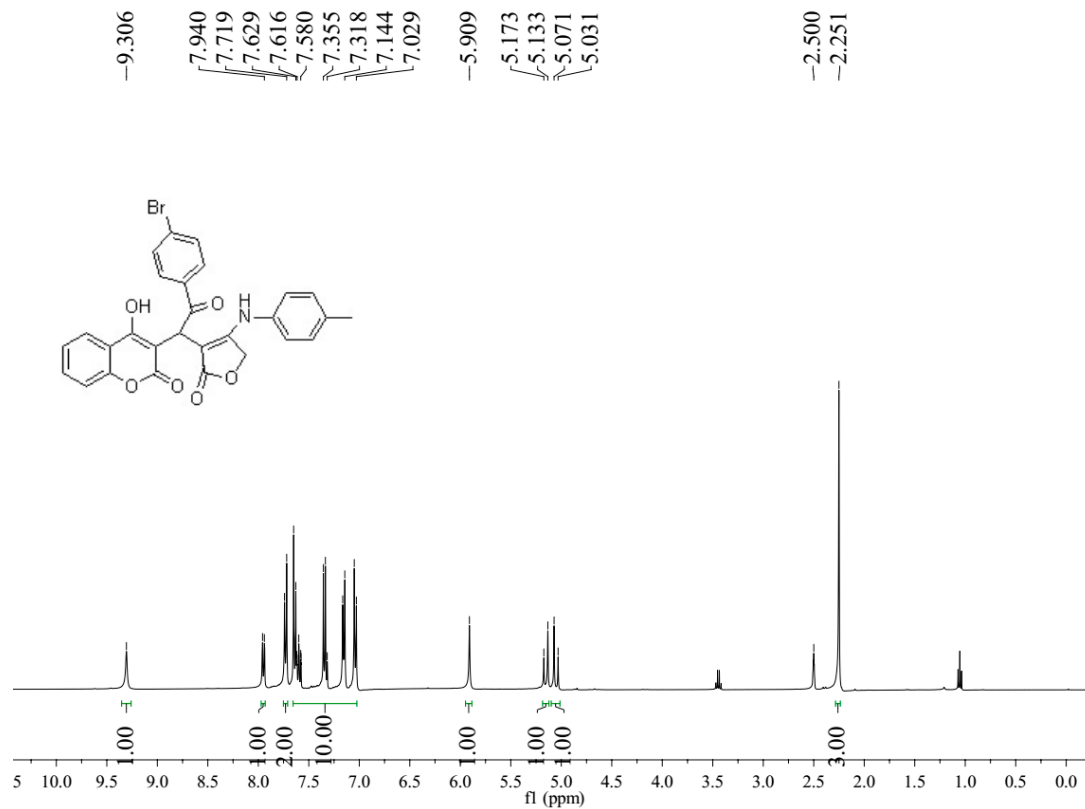

$^{13}\text{C}$  NMR of compound **6f**

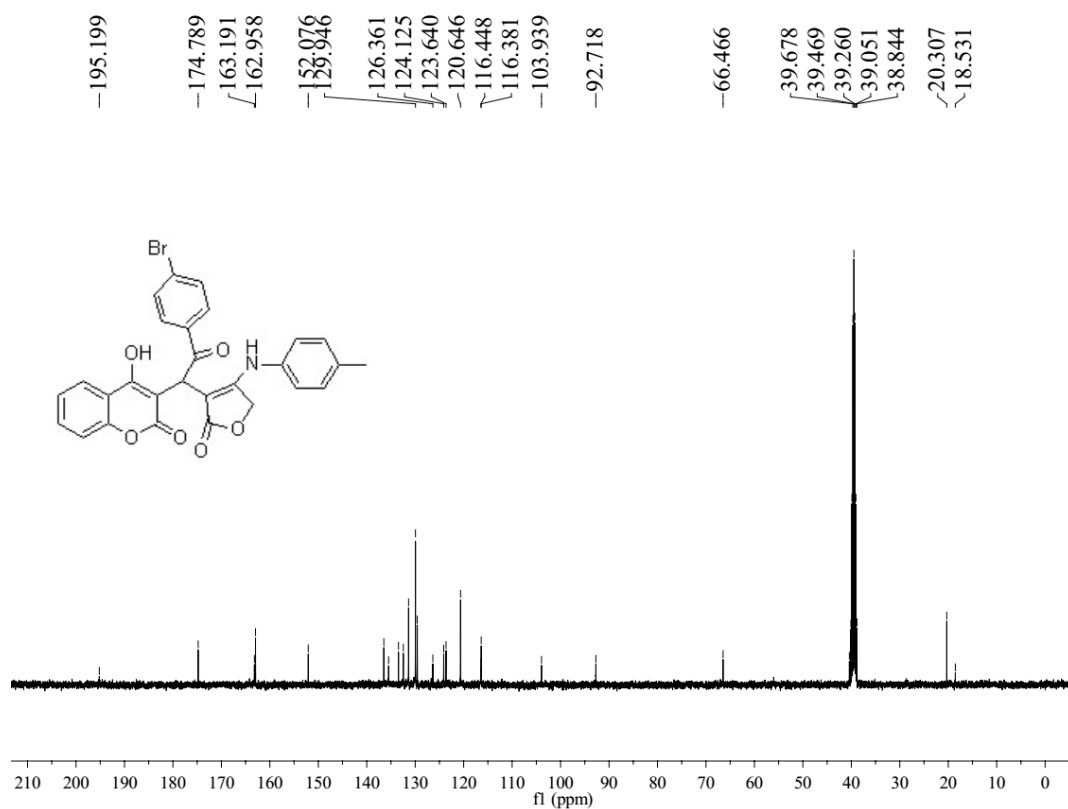

$^1\text{H}$  NMR of compound **6g**

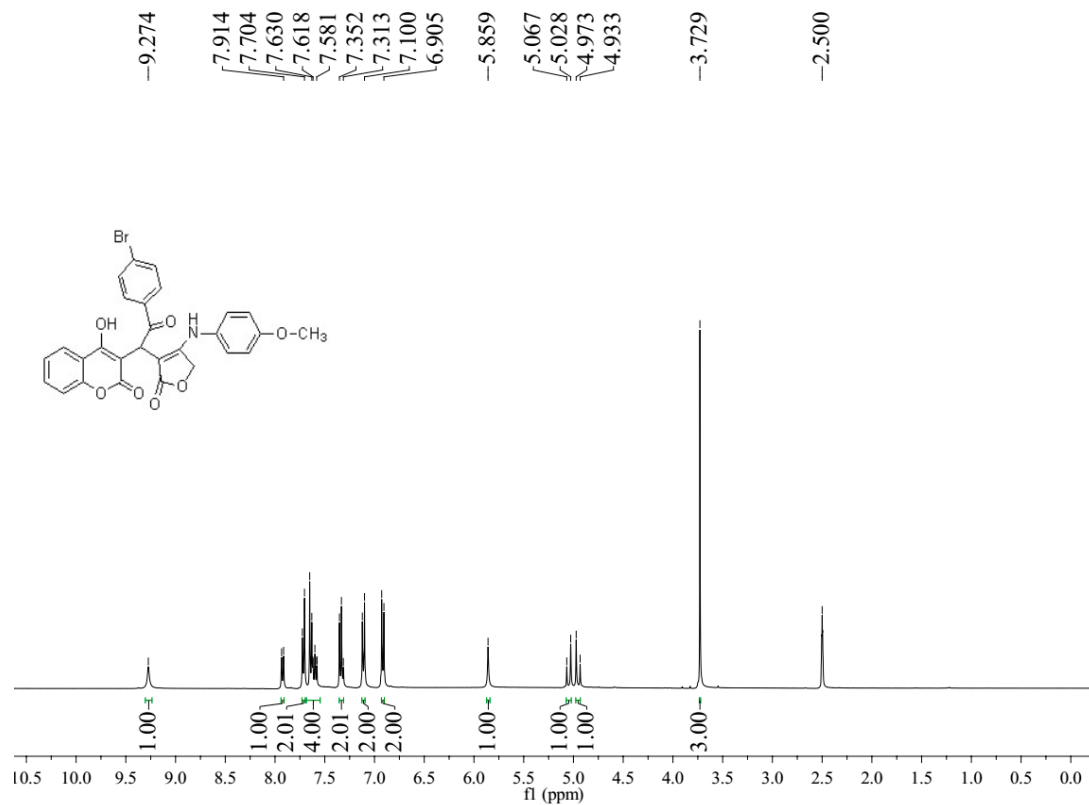

<sup>13</sup>C NMR of compound **6g**

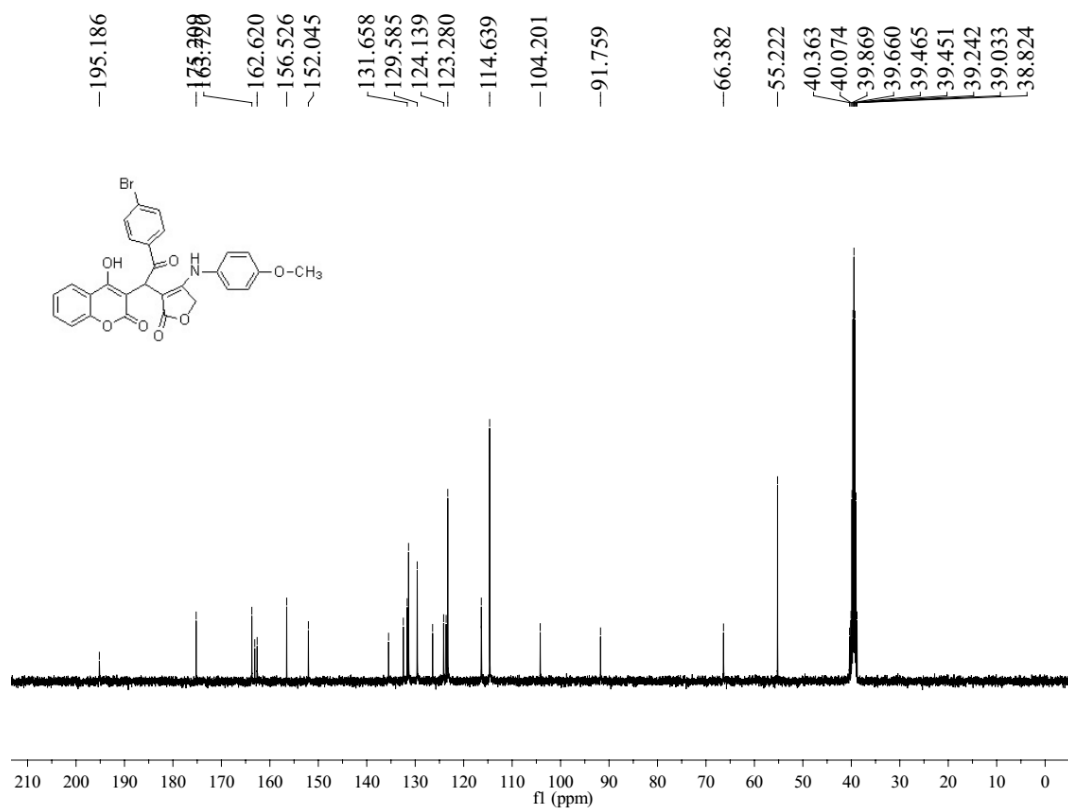

<sup>1</sup>H NMR of compound **6h**

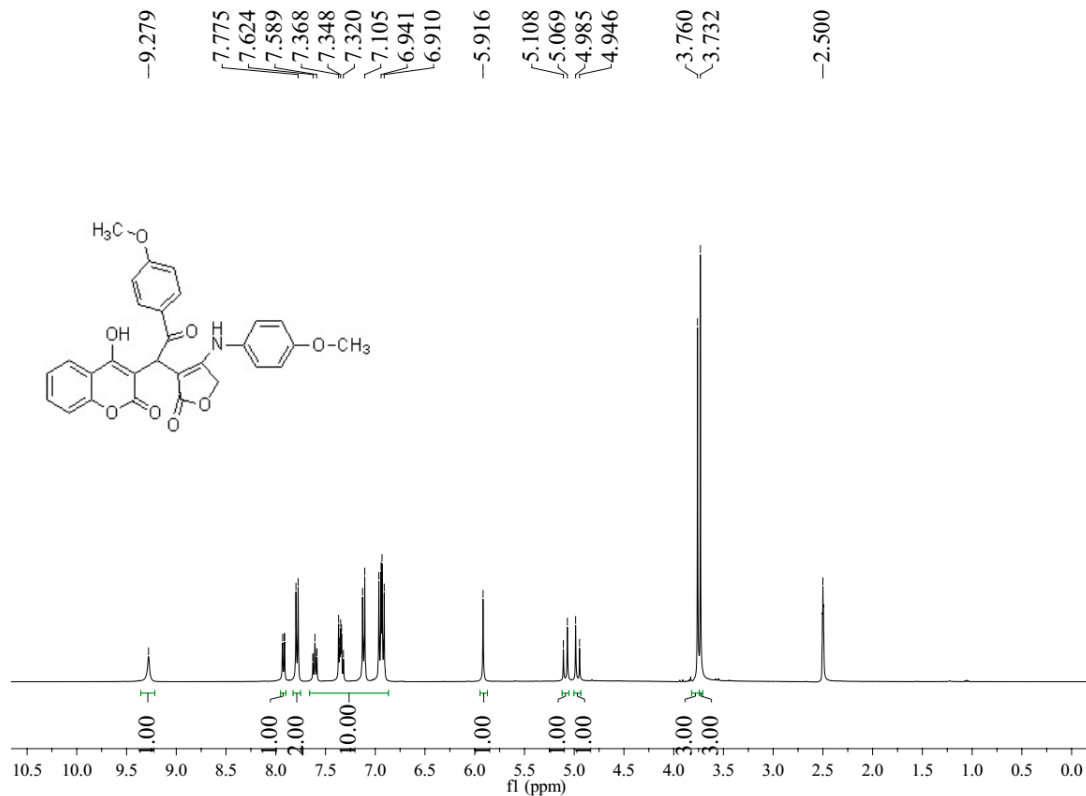

<sup>13</sup>C NMR of compound **6h**

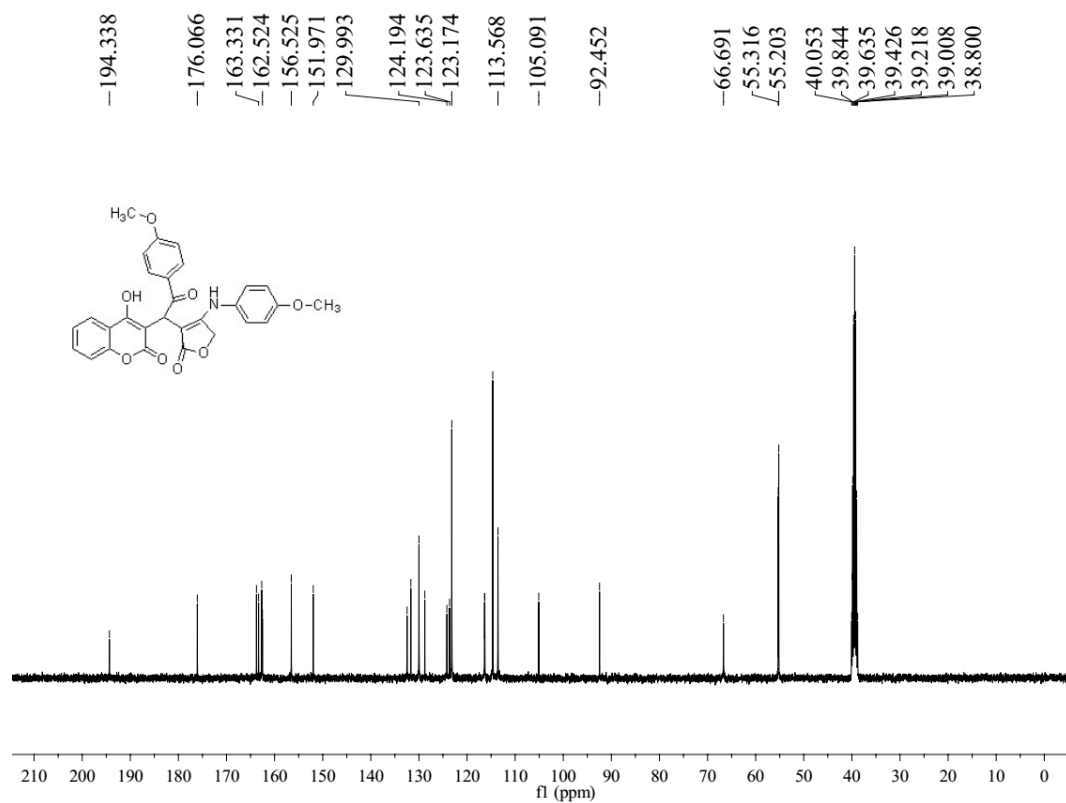

<sup>1</sup>H NMR of compound **6i**

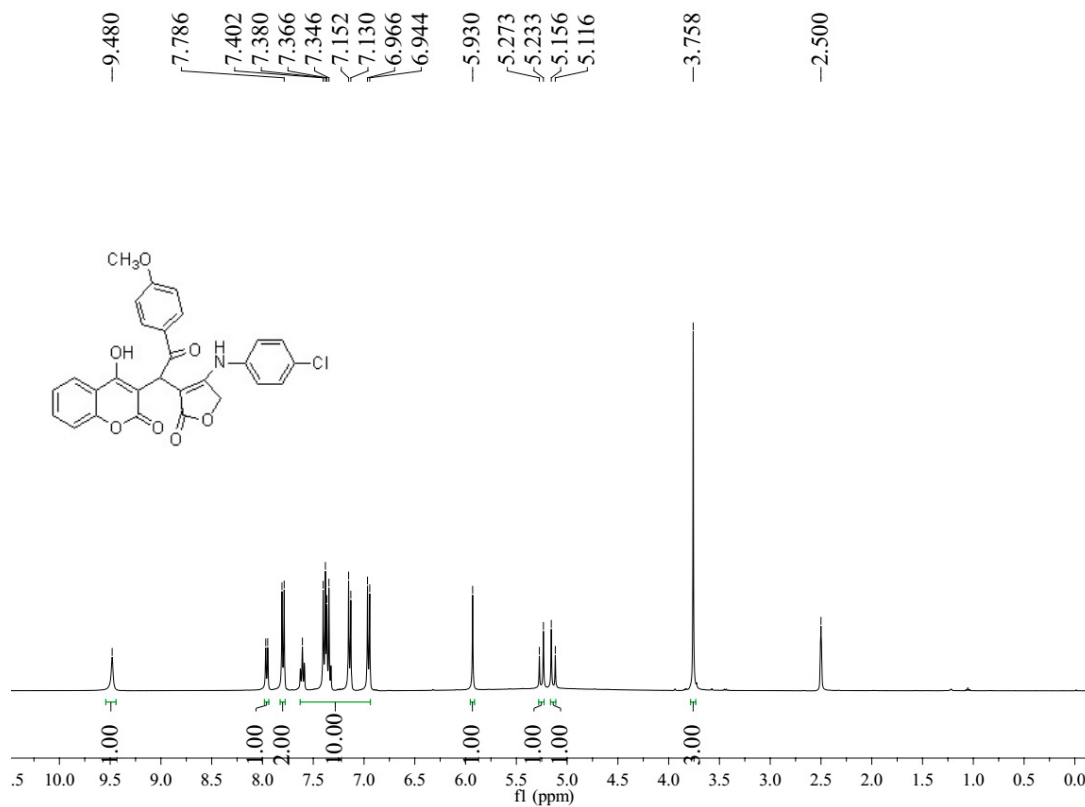

<sup>13</sup>C NMR of compound **6i**

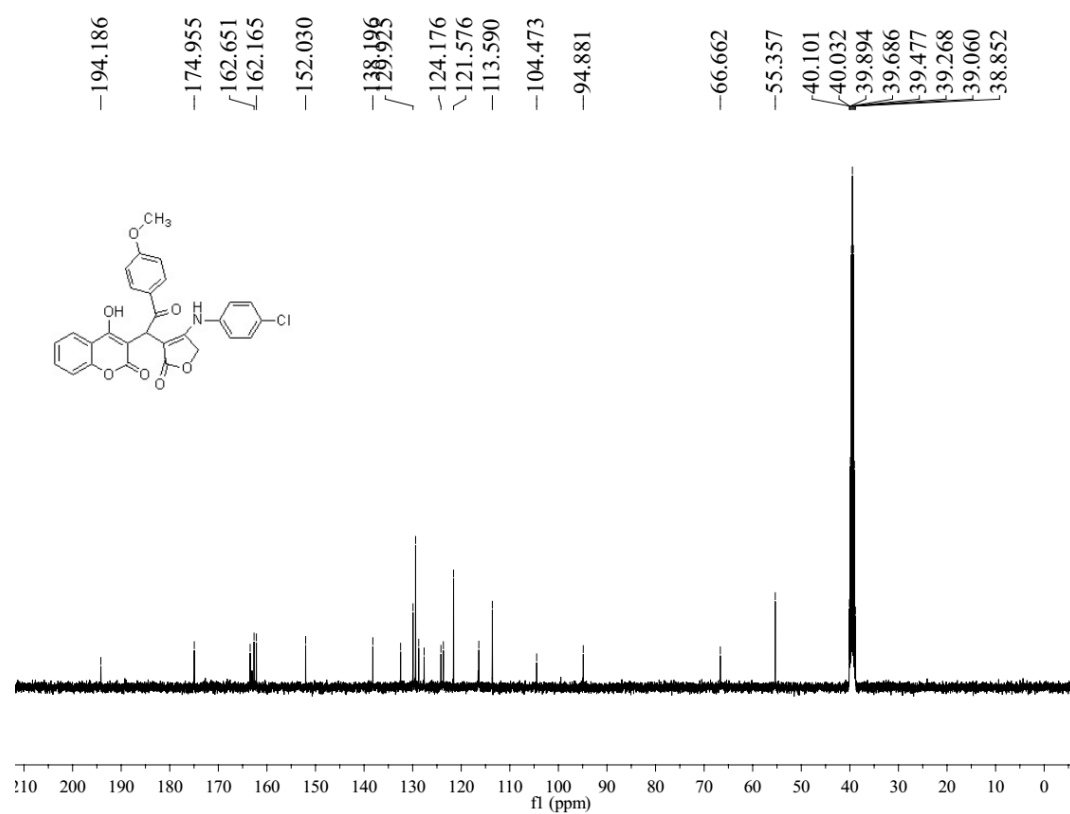

Supplement: Supplementary file 1 [file molecules-23-00235-s001.pdf]
